# Supplementary material for: Conformal phosphating hierarchical interface of CC/CoNiMn–P for hybrid supercapacitors with high cycling stability
Source: Royal Society of Chemistry journal article supplement (doi:10.1039/d5qi00123d), 2025-01-01
Supplement: d5qi00123d1.pdf [file d5qi00123d1.pdf]

## Supporting Information

### **Conformal phosphating hierarchical interface of CC/CoNiMn-P for hybrid supercapacitors with high rate stable cycling**

Dongxu Wang <sup>a</sup>, Feng Zhu <sup>a</sup>, Yupeng Dang <sup>a</sup>, Jingze Luan <sup>a</sup>, Mingquan Li <sup>c</sup>, Zexiang Shen <sup>d\*</sup>, Dandan Han <sup>a, b\*</sup>

*<sup>a</sup>College of Chemistry and Pharmaceutical Engineering, Jilin Institute of Chemical Technology, Jilin 132022, China*

*<sup>b</sup>College of Biology & Food Engineering, Jilin Institute of Chemical Technology, Jilin 132022, China*

*<sup>c</sup>Jilin Weisheng Energy Technology Development Co., Ltd., Jilin 132022, China*

*<sup>d</sup>School of Physical & Mathematical Sciences, Nanyang Technological University, 21 Nanyang Link, 637371, Singapore*

\*Corresponding author.

*E-mail address:* luckhan2006@163.com (D.H.) ; zexiang@ntu.edu.sg (Z.X.S)

**Figure S1.** (a1, a2) SEM images of CC/CoNiMn-OH-1 and (b1, b2) SEM images of CC/CoNiMn-OH-3.

**Figure S2.** (a1, a2) SEM images of CC/CoNiMn-P-450 and (b1, b2) SEM images of CC/CoNiMn-P-550.

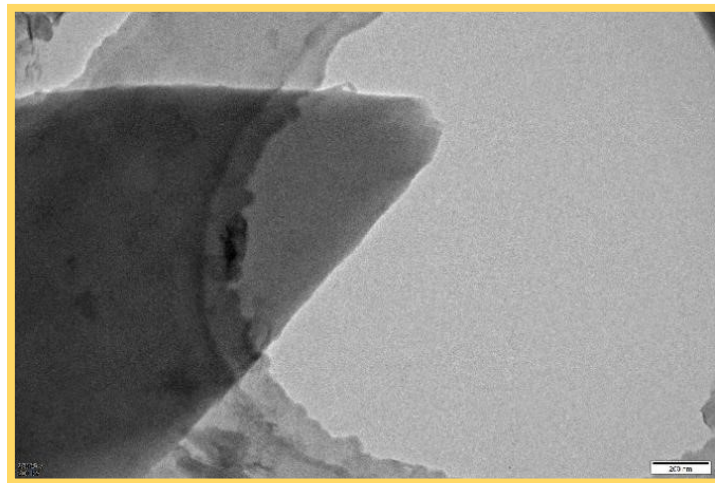

**Figure S3.** TEM image of CC/Co-MOF.

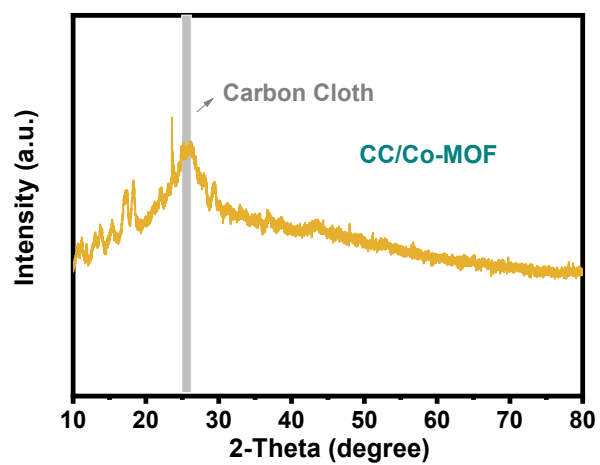

**Figure S4.** XRD pattern of CC/Co-MOF.

**Figure S5.** EDX spectrum of CC/Co-MOF.

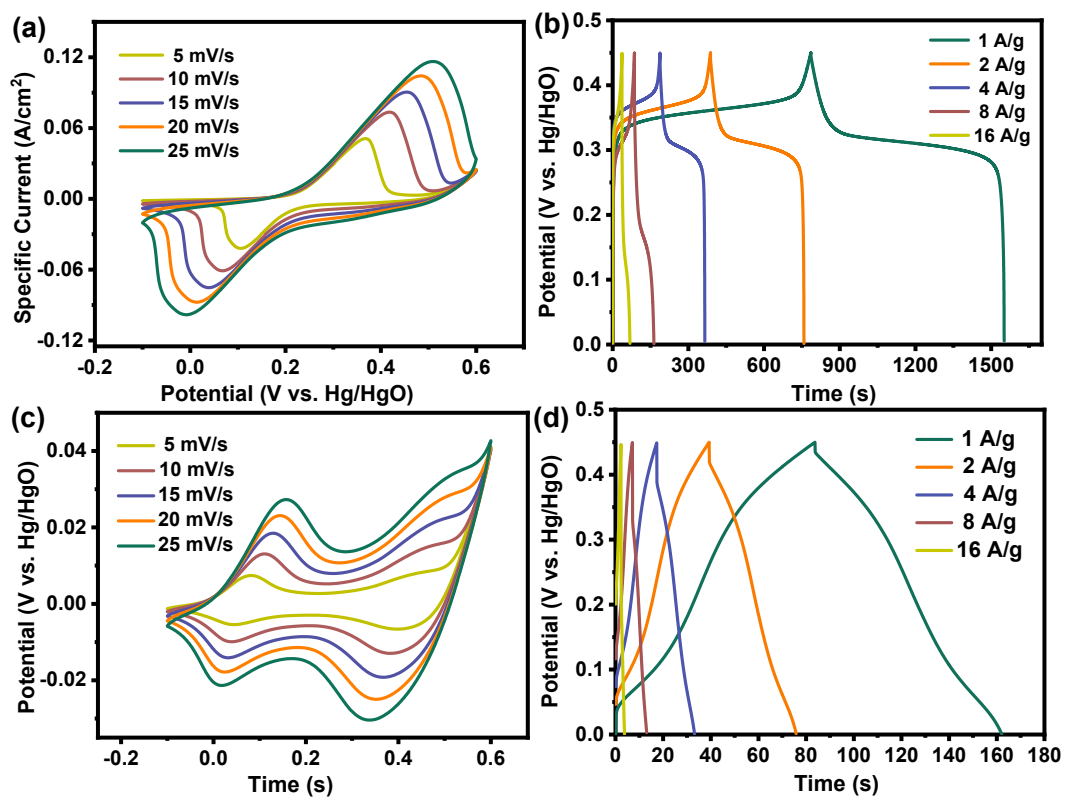

**Figure S6.** (a) and (c) CV curves of CC/CoNiMn-OH-2 and CC/Co-MOF, (b) and (d)

GCD curves of CC/CoNiMn-OH-2 and CC/Co-MOF



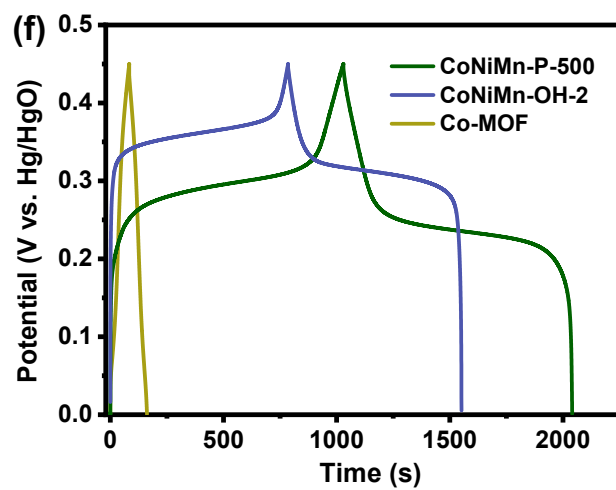

**Figure S7.** GCD curves of the samples at a current density of  $1 \text{ A} \cdot \text{g}^{-1}$



□

**Figure S8.** CV and GCD curves of CC/CoMn-OH, CC/CoNi-OH and CC/CoNiMn-OH.

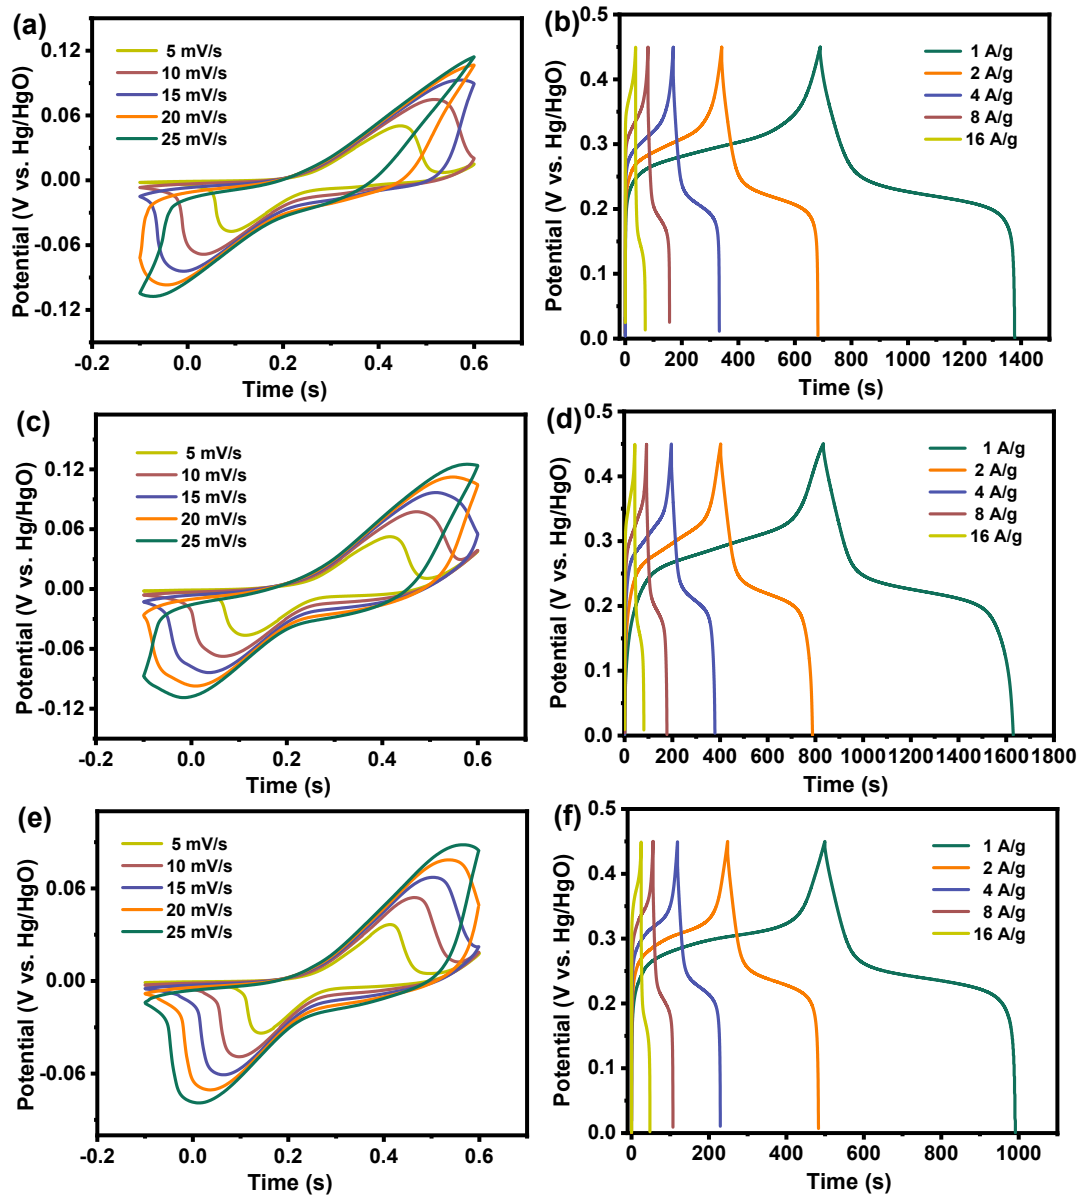

**Figure S9.** CV and GCD curves of CC/CoNiMn-P-400, CC/CoNiMn-P-450 and CC/CoNiMn-P-550.

**Figure S10.** The Nyquist curve of CC/CoNiMn-OH (1, 2, 3) and CC/CoNiMn-P (400, 450, 500, 550).

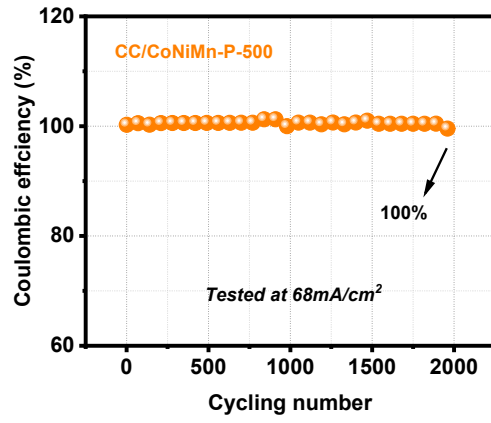

**Figure S11.** The coulombic efficiency of CC/CoNiMn-P-500.

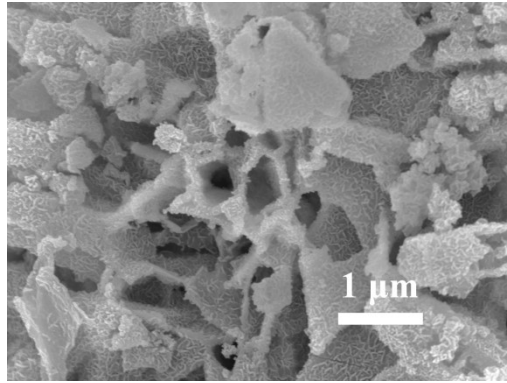

**Figure S12.** The SEM images of CC/CoNiMn-P-500 after 10,000 charge-discharge cycles.
